# Supplementary material for: Perturbations in small molecule synthesis uncovers an iron-responsive secondary metabolite network in Aspergillus fumigatus
Source: Front Microbiol. 2014 Oct 24;5:530. doi: 10.3389/fmicb.2014.00530 (PMC4208449; doi:10.3389/fmicb.2014.00530)
Supplement: Figure S2 — Fold enrichment of functional categories of the common gene set at least two-fold down-regulated in OE::hasA compared to WT and OE::hasA/ΔhasD. Gene sets were analyzed using the Munich Information Center for Protein Sequences Functional Catalog as described in Material and Methods. [file DataSheet2.XLSX]

## Sheet: up-regulated
Used file: Entries: 404
Your provided set of 404 genes:
AFUA_5G10220
AFUA_4G14510
AFUA_6G09880
AFUA_5G10210
AFUA_8G06060
AFUA_5G10090
AFUA_5G02660
AFUA_2G05290
AFUA_5G10200
AFUA_6G11530
AFUA_3G12900
AFUA_3G12910
AFUA_5G02630
AFUA_4G00900
AFUA_3G12920
AFUA_3G01960
AFUA_5G09960
AFUA_1G13660
AFUA_3G12890
AFUA_2G12740
AFUA_5G02640
AFUA_6G03345
AFUA_4G13820
AFUA_5G02620
AFUA_7G06680
AFUA_7G05180
AFUA_6G10580
AFUA_2G17400
AFUA_5G02670
AFUA_8G06070
AFUA_4G00200
AFUA_4G14570
AFUA_6G11990
AFUA_4G00700
AFUA_4G03940
AFUA_4G14030
AFUA_1G01690
AFUA_1G10150
AFUA_6G08490
AFUA_2G00580
AFUA_3G14800
AFUA_3G12930
AFUA_3G01240
AFUA_3G01270
AFUA_4G13860
AFUA_8G01870
AFUA_8G01080
AFUA_3G03290
AFUA_8G01860
AFUA_3G02770
AFUA_2G12780
AFUA_8G06680
AFUA_6G02580
AFUA_3G03550
AFUA_3G03210
AFUA_4G01120
AFUA_2G00990
AFUA_4G03920
AFUA_1G01160
AFUA_4G08450
AFUA_5G06070
AFUA_1G16440
AFUA_8G01400
AFUA_3G00560
AFUA_6G02810
AFUA_4G00980
AFUA_2G15330
AFUA_4G00710
AFUA_7G06800
AFUA_1G11340
AFUA_2G16580
AFUA_1G01670
AFUA_4G13830
AFUA_4G01580
AFUA_4G00990
AFUA_5G10490
AFUA_1G01530
AFUA_3G01400
AFUA_8G02280
AFUA_4G14520
AFUA_2G13930
AFUA_5G12960
AFUA_5G14582
AFUA_2G14760
AFUA_3G02500
AFUA_4G08700
AFUA_8G02490
AFUA_2G16570
AFUA_1G17620
AFUA_4G00195
AFUA_2G17300
AFUA_3G02670
AFUA_4G14730
AFUA_4G03930
AFUA_2G01770
AFUA_7G01040
AFUA_7G04880
AFUA_6G01850
AFUA_4G01130
AFUA_6G08460
AFUA_3G15350
AFUA_2G17520
AFUA_3G02253
AFUA_4G00250
AFUA_7G08310
AFUA_6G00180
AFUA_7G01720
AFUA_1G17690
AFUA_7G06523
AFUA_1G11300
AFUA_4G00910
AFUA_6G10710
AFUA_4G00720
AFUA_3G00870
AFUA_5G01370
AFUA_2G04380
AFUA_1G00420
AFUA_m0450
AFUA_2G13615
AFUA_8G01260
AFUA_4G00460
AFUA_3G07660
AFUA_4G01380
AFUA_5G14240
AFUA_1G00310
AFUA_7G04730
AFUA_1G15430
AFUA_7G06250
AFUA_3G00730
AFUA_3G14530
AFUA_1G16630
AFUA_5G01230
AFUA_6G00270
AFUA_1G12410
AFUA_4G01510
AFUA_4G03170
AFUA_3G13580
AFUA_7G06920
AFUA_3G02690
AFUA_6G01840
AFUA_5G14260
AFUA_6G11950
AFUA_2G03730
AFUA_1G16760
AFUA_8G01920
AFUA_3G01620
AFUA_1G14550
AFUA_5G02650
AFUA_1G00110
AFUA_7G00805
AFUA_1G00720
AFUA_5G14600
AFUA_4G01040
AFUA_2G09282
AFUA_4G01260
AFUA_2G08360
AFUA_3G02760
AFUA_5G14730
AFUA_6G03380
AFUA_8G06760
AFUA_1G16564
AFUA_4G14130
AFUA_3G14400
AFUA_7G06690
AFUA_7G08290
AFUA_3G00450
AFUA_2G00260
AFUA_6G02800
AFUA_2G15340
AFUA_2G14630
AFUA_2G07610
AFUA_2G17270
AFUA_4G08690
AFUA_2G17720
AFUA_3G07300
AFUA_7G06460
AFUA_5G10040
AFUA_3G01300
AFUA_5G00920
AFUA_4G00870
AFUA_4G01105
AFUA_2G02500
AFUA_5G06820
AFUA_5G00120
AFUA_1G11230
AFUA_4G03325
AFUA_4G01500
AFUA_6G12000
AFUA_3G01460
AFUA_2G12500
AFUA_3G02680
AFUA_1G03180
AFUA_6G13080
AFUA_5G07650
AFUA_4G04700
AFUA_5G10510
AFUA_1G02040
AFUA_5G00110
AFUA_1G01680
AFUA_2G06010
AFUA_5G02270
AFUA_2G14350
AFUA_4G14580
AFUA_4G09480
AFUA_8G02630
AFUA_7G00530
AFUA_8G06630
AFUA_6G02820
AFUA_4G00630
AFUA_4G09530
AFUA_3G07540
AFUA_5G08730
AFUA_2G00980
AFUA_2G01720
AFUA_4G13940
AFUA_7G00540
AFUA_3G00350
AFUA_5G12760
AFUA_4G01030
AFUA_3G02900
AFUA_4G14540
AFUA_4G14290
AFUA_1G01900
AFUA_1G06100
AFUA_3G03380
AFUA_5G15020
AFUA_1G01300
AFUA_2G08370
AFUA_4G09890
AFUA_4G00110
AFUA_1G13000
AFUA_4G03540
AFUA_6G08020
AFUA_3G03520
AFUA_1G16080
AFUA_5G10420
AFUA_4G10950
AFUA_3G01090
AFUA_8G01770
AFUA_5G00590
AFUA_6G10800
AFUA_1G01700
AFUA_8G01380
AFUA_1G06470
AFUA_4G01050
AFUA_5G10180
AFUA_2G00940
AFUA_4G14380
AFUA_6G07840
AFUA_6G11630
AFUA_3G15070
AFUA_7G06600
AFUA_6G07650
AFUA_1G17512
AFUA_6G01830
AFUA_2G08840
AFUA_7G00680
AFUA_8G05520
AFUA_2G09520
AFUA_7G07060
AFUA_3G15080
AFUA_5G02320
AFUA_4G03690
AFUA_1G01770
AFUA_2G08830
AFUA_3G01210
AFUA_5G13420
AFUA_4G09920
AFUA_1G13230
AFUA_8G00650
AFUA_2G00570
AFUA_6G09340
AFUA_2G10480
AFUA_4G04140
AFUA_7G06910
AFUA_3G08310
AFUA_1G03200
AFUA_2G00100
AFUA_4G09230
AFUA_2G14620
AFUA_1G04830
AFUA_7G06890
AFUA_8G06850
AFUA_6G11520
AFUA_3G06940
AFUA_3G02685
AFUA_6G03340
AFUA_6G03230
AFUA_4G14640
AFUA_8G05220
AFUA_7G08640
AFUA_1G17280
AFUA_8G02590
AFUA_2G00870
AFUA_1G16140
AFUA_1G01940
AFUA_8G01410
AFUA_7G01170
AFUA_2G16980
AFUA_6G14640
AFUA_2G00740
AFUA_4G04605
AFUA_5G09150
AFUA_5G00640
AFUA_4G09470
AFUA_4G14530
AFUA_8G00630
AFUA_8G02640
AFUA_4G00225
AFUA_1G03800
AFUA_1G12620
AFUA_6G00600
AFUA_7G00950
AFUA_3G01500
AFUA_7G00870
AFUA_4G08870
AFUA_4G09300
AFUA_2G10650
AFUA_6G08480
AFUA_2G07820
AFUA_3G02930
AFUA_5G02655
AFUA_2G10720
AFUA_4G14751
AFUA_8G07300
AFUA_2G14400
AFUA_3G01560
AFUA_1G04330
AFUA_6G03350
AFUA_2G10020
AFUA_5G06080
AFUA_8G05030
AFUA_6G14300
AFUA_4G04080
AFUA_1G16920
AFUA_4G04380
AFUA_8G06450
AFUA_2G00240
AFUA_2G11630
AFUA_5G14490
AFUA_1G13680
AFUA_3G00610
AFUA_5G13670
AFUA_8G01940
AFUA_1G13670
AFUA_3G01700
AFUA_1G01640
AFUA_5G07960
AFUA_6G13610
AFUA_3G14750
AFUA_1G10160
AFUA_2G05635
AFUA_3G10680
AFUA_4G08790
AFUA_3G00710
AFUA_5G00910
AFUA_1G10140
AFUA_7G06580
AFUA_3G13560
AFUA_3G05610
AFUA_1G09757
AFUA_2G02490
AFUA_1G00270
AFUA_4G03800
AFUA_1G16420
AFUA_3G13010
AFUA_4G12410
AFUA_3G09620
AFUA_4G13960
AFUA_4G13950
AFUA_3G13670
AFUA_5G14720
AFUA_4G12340
AFUA_2G00110
AFUA_3G00930
AFUA_1G17270
AFUA_7G00690
AFUA_2G04300
AFUA_2G17430
AFUA_5G14760
AFUA_7G06526
AFUA_2G15670
AFUA_3G03600
AFUA_1G09890
AFUA_6G11600
AFUA_3G07620
AFUA_6G01790
AFUA_7G06850
AFUA_8G02060
AFUA_5G00810
AFUA_1G01330
AFUA_5G00860
AFUA_3G13660
AFUA_7G08650
AFUA_5G10160
AFUA_1G06540
AFUA_2G03510
AFUA_7G00920
AFUA_8G06570
AFUA_4G04415
AFUA_1G12690
AFUA_4G07010
AFUA_4G14280
AFUA_1G02620
The comparison is done to p3_r14003_Asp_fumig containing 9630 annotated genes.
401 out of 404 genes are found:
AFUA_1G00110 AFUA_1G00270 AFUA_1G00310 AFUA_1G00420 AFUA_1G00720 AFUA_1G01160 AFUA_1G01300 AFUA_1G01330 AFUA_1G01530 AFUA_1G01640 AFUA_1G01670 AFUA_1G01680 AFUA_1G01690 AFUA_1G01700 AFUA_1G01770 AFUA_1G01900 AFUA_1G01940 AFUA_1G02040 AFUA_1G02620 AFUA_1G03180 AFUA_1G03200 AFUA_1G03800 AFUA_1G04330 AFUA_1G04830 AFUA_1G06100 AFUA_1G06470 AFUA_1G06540 AFUA_1G09757 AFUA_1G09890 AFUA_1G10140 AFUA_1G10…
		FUNCTIONAL CATEGORY	abs SET	rel SET	genes SET	abs GENOME	rel GENOME	rel SET/rel GENOME	P-VALUE
		01 METABOLISM	163	40.6	AFUA_8G02280 AFUA_8G06570 AFUA_8G02060 AFUA_8G06450 AFUA_8G01380 AFUA_8G05520 AFUA_8G02640 AFUA_8G02630 AFUA_8G01410 AFUA_8G01860 AFUA_8G06680 AFUA_8G07300 AFUA_8G05220 AFUA_8G02590 AFUA_7G04730 AFUA_7G00690 AFUA_7G00950 AFUA_7G06600 AFUA_7G00530 AFUA_7G08290 AFUA_7G06250 AFUA_7G06580 AFUA_7G06920 AFUA_7G01720 AFUA_7G06526 AFUA_7G06800 AFUA_7G04880 AFUA_7G06690 AFUA_7G00870 AFUA_6G08020 AFUA_6G13…	3379	35	1.16	0.0104257
		01.02.07.01 regulation of nitrogen metabolism	4	0.99	AFUA_7G06920 AFUA_6G01840 AFUA_5G10160 AFUA_4G14530	25	0.25	3.96	0.0187199
		01.05.11 aromate metabolism	7	1.74	AFUA_8G05520 AFUA_8G07300 AFUA_4G01380 AFUA_3G14800 AFUA_3G08310 AFUA_3G01460 AFUA_1G13660	72	0.74	2.35135	0.0297105
		01.06 lipid, fatty acid and isoprenoid metabolism	41	10.2	AFUA_8G02060 AFUA_8G01380 AFUA_8G06680 AFUA_8G05220 AFUA_8G02590 AFUA_7G08290 AFUA_7G01720 AFUA_7G04880 AFUA_6G08480 AFUA_6G10800 AFUA_6G14300 AFUA_6G08460 AFUA_5G00110 AFUA_5G00120 AFUA_5G09150 AFUA_5G10420 AFUA_5G14260 AFUA_5G10180 AFUA_5G00640 AFUA_4G13860 AFUA_4G01040 AFUA_4G03800 AFUA_4G10950 AFUA_4G00910 AFUA_3G01270 AFUA_3G03600 AFUA_3G14530 AFUA_2G17400 AFUA_2G10650 AFUA_2G07610 AFUA_2G00…	724	7.51	1.35819	0.0263049
		01.20 secondary metabolism	82	20.4	AFUA_8G06450 AFUA_8G05520 AFUA_8G02640 AFUA_8G01860 AFUA_8G05220 AFUA_7G04730 AFUA_7G00690 AFUA_7G06250 AFUA_7G06580 AFUA_7G06526 AFUA_7G06690 AFUA_6G09880 AFUA_6G11630 AFUA_6G10800 AFUA_6G03350 AFUA_6G14640 AFUA_6G08460 AFUA_5G00110 AFUA_5G14240 AFUA_5G00120 AFUA_5G10040 AFUA_5G02640 AFUA_5G14582 AFUA_5G15020 AFUA_5G02620 AFUA_5G09150 AFUA_5G02660 AFUA_5G10180 AFUA_5G10220 AFUA_5G14490 AFUA_4G14…	1132	11.7	1.74359	2.35373e-07
		01.20.05.03 metabolism of alkanes, alkenes, alkanals, alkanols	4	0.99	AFUA_6G08460 AFUA_5G00120 AFUA_4G03800 AFUA_1G01690	8	0.08	12.375	0.000181451
		01.25.11 extracellular aminosaccharide degradation	2	0.49	AFUA_1G06470 AFUA_1G00310	3	0.03	16.3333	0.00504604
		02.45 energy conversion and regeneration	7	1.74	AFUA_6G08490 AFUA_6G08460 AFUA_5G00120 AFUA_4G03800 AFUA_1G01640 AFUA_1G01690 AFUA_1G17620	74	0.76	2.28947	0.0338474
		16.05 polysaccharide binding	7	1.74	AFUA_8G01410 AFUA_6G13610 AFUA_6G11600 AFUA_4G09480 AFUA_2G09520 AFUA_2G12780 AFUA_1G00310	36	0.37	4.7027	0.000602967
		20.01.01.01 cation transport (H+, Na+, K+, Ca2+ , NH4+, etc.)	16	3.99	AFUA_7G04730 AFUA_7G00530 AFUA_6G08020 AFUA_6G02820 AFUA_4G03940 AFUA_4G14640 AFUA_4G01050 AFUA_3G02670 AFUA_3G07540 AFUA_3G13670 AFUA_3G07300 AFUA_3G01400 AFUA_2G08830 AFUA_2G03730 AFUA_1G09757 AFUA_1G17270	203	2.1	1.9	0.0106431
		20.01.01.01.01 heavy metal ion transport (Cu+, Fe3+, etc.)	9	2.24	AFUA_7G04730 AFUA_6G02820 AFUA_4G03940 AFUA_4G14640 AFUA_3G02670 AFUA_3G13670 AFUA_2G08830 AFUA_2G03730 AFUA_1G17270	78	0.8	2.8	0.00493159
		20.01.01.01.01.01 siderophore-iron transport	6	1.49	AFUA_7G04730 AFUA_6G02820 AFUA_4G03940 AFUA_3G02670 AFUA_3G13670 AFUA_1G17270	33	0.34	4.38235	0.00213731
		20.01.27 drug/toxin transport	18	4.48	AFUA_8G06760 AFUA_6G08020 AFUA_6G14640 AFUA_5G06070 AFUA_5G10510 AFUA_5G14490 AFUA_4G03920 AFUA_4G14130 AFUA_4G13820 AFUA_4G13830 AFUA_4G01050 AFUA_3G07300 AFUA_3G02760 AFUA_3G01400 AFUA_2G12500 AFUA_1G12690 AFUA_1G03200 AFUA_1G12620	158	1.64	2.73171	9.74093e-05
		20.03.22 transport ATPases	12	2.99	AFUA_7G06680 AFUA_6G08020 AFUA_5G06070 AFUA_5G01230 AFUA_4G14130 AFUA_4G01260 AFUA_4G01050 AFUA_3G07300 AFUA_3G02760 AFUA_3G01400 AFUA_2G14760 AFUA_1G12690	93	0.96	3.11458	0.000452434
		20.03.25 ABC transporters	17	4.23	AFUA_6G08020 AFUA_6G14640 AFUA_5G06070 AFUA_5G10510 AFUA_5G14730 AFUA_4G03920 AFUA_4G14130 AFUA_4G13820 AFUA_4G01050 AFUA_3G07300 AFUA_3G07620 AFUA_3G02760 AFUA_3G01400 AFUA_1G12690 AFUA_1G16440 AFUA_1G03200 AFUA_1G12620	84	0.87	4.86207	4.76719e-08
		20.09.16 cellular export and secretion	21	5.23	AFUA_8G02280 AFUA_7G06680 AFUA_6G08020 AFUA_6G08480 AFUA_6G14640 AFUA_5G06070 AFUA_5G10510 AFUA_5G14490 AFUA_4G07010 AFUA_4G03920 AFUA_4G14130 AFUA_4G13820 AFUA_4G01050 AFUA_3G07540 AFUA_3G02760 AFUA_3G01400 AFUA_2G12500 AFUA_1G12690 AFUA_1G16440 AFUA_1G03200 AFUA_1G12620	234	2.42	2.16116	0.000749947
		20.09.16.01 Type I protein secretion system (ABC-type transport systems)	12	2.99	AFUA_6G08020 AFUA_6G14640 AFUA_5G06070 AFUA_4G03920 AFUA_4G14130 AFUA_4G01050 AFUA_3G02760 AFUA_3G01400 AFUA_1G12690 AFUA_1G16440 AFUA_1G03200 AFUA_1G12620	34	0.35	8.54286	5.50939e-09
		20.09.16.05 Type V protein secretion system (MttABC or TatABCDE-system)	1	0.24	AFUA_4G07010	1	0.01	24	0.0416407
		32.05 disease, virulence and defense	29	7.23	AFUA_8G06570 AFUA_8G06760 AFUA_7G00920 AFUA_7G04880 AFUA_6G08020 AFUA_6G10800 AFUA_6G14640 AFUA_5G06070 AFUA_5G02640 AFUA_5G10220 AFUA_5G14490 AFUA_4G03920 AFUA_4G14130 AFUA_4G13820 AFUA_4G03540 AFUA_4G03690 AFUA_4G01050 AFUA_3G13580 AFUA_3G07300 AFUA_3G13560 AFUA_3G02760 AFUA_3G12920 AFUA_3G01400 AFUA_2G12500 AFUA_1G12690 AFUA_1G02040 AFUA_1G03200 AFUA_1G10140 AFUA_1G12620	340	3.53	2.04816	0.000189154
		32.05.01 resistance proteins	17	4.23	AFUA_8G06760 AFUA_6G08020 AFUA_6G14640 AFUA_5G06070 AFUA_5G14490 AFUA_4G03920 AFUA_4G14130 AFUA_4G13820 AFUA_4G01050 AFUA_3G13580 AFUA_3G07300 AFUA_3G02760 AFUA_3G01400 AFUA_2G12500 AFUA_1G12690 AFUA_1G03200 AFUA_1G12620	145	1.5	2.82	0.000106145
		32.05.01.03 chemical agent resistance	7	1.74	AFUA_8G06760 AFUA_6G08020 AFUA_4G13820 AFUA_4G01050 AFUA_3G07300 AFUA_3G01400 AFUA_1G03200	53	0.55	3.16364	0.00606961
		32.05.03 defense related proteins	6	1.49	AFUA_8G06760 AFUA_6G10800 AFUA_4G03690 AFUA_3G13580 AFUA_3G12920 AFUA_1G02040	55	0.57	2.61404	0.0260466
		32.07 detoxification	30	7.48	AFUA_8G06760 AFUA_7G06890 AFUA_6G08020 AFUA_6G14640 AFUA_5G06070 AFUA_5G15020 AFUA_5G02620 AFUA_5G01230 AFUA_5G10180 AFUA_5G14490 AFUA_4G03920 AFUA_4G13860 AFUA_4G14130 AFUA_4G00110 AFUA_4G13820 AFUA_4G13830 AFUA_4G14530 AFUA_4G01050 AFUA_3G07300 AFUA_3G02760 AFUA_3G01400 AFUA_2G12500 AFUA_2G08370 AFUA_2G17300 AFUA_1G12690 AFUA_1G12410 AFUA_1G03200 AFUA_1G14550 AFUA_1G06100 AFUA_1G12620	375	3.89	1.92288	0.000443638
		32.07.03 detoxification by modification	5	1.24	AFUA_5G15020 AFUA_5G10180 AFUA_2G17300 AFUA_1G14550 AFUA_1G06100	42	0.43	2.88372	0.0292949
		32.07.05 detoxification by export	17	4.23	AFUA_8G06760 AFUA_6G08020 AFUA_6G14640 AFUA_5G06070 AFUA_5G14490 AFUA_4G03920 AFUA_4G14130 AFUA_4G13820 AFUA_4G13830 AFUA_4G01050 AFUA_3G07300 AFUA_3G02760 AFUA_3G01400 AFUA_2G12500 AFUA_1G12690 AFUA_1G03200 AFUA_1G12620	127	1.31	3.22901	1.91807e-05
		32.07.07 oxygen and radical detoxification	6	1.49	AFUA_7G06890 AFUA_4G14530 AFUA_2G08370 AFUA_2G17300 AFUA_1G14550 AFUA_1G06100	64	0.66	2.25758	0.0495093
		32.07.07.03 glutathione conjugation reaction	4	0.99	AFUA_4G14530 AFUA_2G08370 AFUA_2G17300 AFUA_1G06100	19	0.19	5.21053	0.0069791
		34.01.01.01 homeostasis of metal ions (Na, K, Ca etc.)	14	3.49	AFUA_7G04730 AFUA_6G08020 AFUA_6G02820 AFUA_4G03940 AFUA_4G14640 AFUA_4G01050 AFUA_3G02670 AFUA_3G07540 AFUA_3G13670 AFUA_3G07300 AFUA_3G01400 AFUA_2G08830 AFUA_2G03730 AFUA_1G17270	173	1.79	1.94972	0.0131723
		99 UNCLASSIFIED PROTEINS	195	48.6	AFUA_8G06850 AFUA_8G00650 AFUA_8G02490 AFUA_8G00630 AFUA_8G01770 AFUA_8G05030 AFUA_8G01080 AFUA_8G01920 AFUA_8G06630 AFUA_8G06070 AFUA_8G06060 AFUA_8G01870 AFUA_7G08640 AFUA_7G06523 AFUA_7G07060 AFUA_7G01170 AFUA_7G00540 AFUA_7G00805 AFUA_7G05180 AFUA_7G06910 AFUA_7G06850 AFUA_7G00680 AFUA_7G08310 AFUA_7G01040 AFUA_7G08650 AFUA_6G11520 AFUA_6G02580 AFUA_6G11950 AFUA_6G10580 AFUA_6G00600 AFUA_6G03…	3792	39.3	1.23664	7.66116e-05
To correct for multiple comparisons in multiple hypothesis testing for the 845 taxonomical allowed FunCats, we calculated the Bonferroni correction as well as the False discovery rate (FDR) control with an experiment-wide significance level alpha of 0.05. The table is sorted by the p-value (k position). You will find as filter the holding criteria B=Bonferroni correction < 0.05, F:p-value < False…

## Sheet: down-regulated
Used file: Entries: 291
Your provided set of 291 genes:
AFUA_4G14250
AFUA_3G14540
AFUA_6G02020
AFUA_3G02570
AFUA_8G06010
AFUA_2G11530
AFUA_3G12090
AFUA_2G10070
AFUA_6G13490
AFUA_6G00340
AFUA_2G15350
AFUA_2G05690
AFUA_4G03830
AFUA_2G03900
AFUA_3G00880
AFUA_2G16230
AFUA_6G00640
AFUA_8G05580
AFUA_2G00630
AFUA_6G13390
AFUA_3G07870
AFUA_1G03360
AFUA_4G09190
AFUA_5G02840
AFUA_1G13610
AFUA_3G12590
AFUA_5G05640
AFUA_1G07220
AFUA_7G06130
AFUA_5G14290
AFUA_4G00660
AFUA_6G13330
AFUA_7G01290
AFUA_2G00180
AFUA_1G10780
AFUA_1G05790
AFUA_2G04080
AFUA_4G03490
AFUA_6G12220
AFUA_7G05110
AFUA_3G14490
AFUA_6G01820
AFUA_4G00390
AFUA_7G08340
AFUA_1G06670
AFUA_3G00430
AFUA_2G02310
AFUA_8G00200
AFUA_1G11500
AFUA_4G09250
AFUA_1G05840
AFUA_8G05610
AFUA_3G01872
AFUA_5G11850
AFUA_2G05390
AFUA_3G10760
AFUA_5G09750
AFUA_5G14210
AFUA_7G00150
AFUA_3G14250
AFUA_6G09100
AFUA_4G03410
AFUA_2G02180
AFUA_2G12510
AFUA_6G00320
AFUA_6G00630
AFUA_5G04060
AFUA_4G11700
AFUA_4G03760
AFUA_3G11070
AFUA_5G02860
AFUA_5G04260
AFUA_4G08140
AFUA_4G07300
AFUA_2G02730
AFUA_1G14500
AFUA_3G03940
AFUA_7G00990
AFUA_4G12700
AFUA_6G03670
AFUA_3G15010
AFUA_2G08080
AFUA_2G09355
AFUA_2G17000
AFUA_3G12760
AFUA_4G06570
AFUA_3G10750
AFUA_6G10080
AFUA_3G03720
AFUA_7G06620
AFUA_3G01840
AFUA_2G17840
AFUA_5G13800
AFUA_7G08350
AFUA_8G01910
AFUA_5G13740
AFUA_8G01600
AFUA_2G11100
AFUA_2G15290
AFUA_3G06020
AFUA_1G05850
AFUA_3G09250
AFUA_4G13380
AFUA_5G04250
AFUA_7G05150
AFUA_3G02270
AFUA_2G14720
AFUA_3G00150
AFUA_2G15930
AFUA_5G14650
AFUA_7G00440
AFUA_3G09210
AFUA_4G07280
AFUA_7G01490
AFUA_6G13990
AFUA_7G02310
AFUA_1G00970
AFUA_8G02550
AFUA_2G13140
AFUA_1G03992
AFUA_8G00190
AFUA_2G04550
AFUA_3G14030
AFUA_8G06980
AFUA_4G09440
AFUA_3G00180
AFUA_8G00210
AFUA_4G11800
AFUA_8G07200
AFUA_2G09220
AFUA_2G16440
AFUA_7G01260
AFUA_8G01480
AFUA_6G14090
AFUA_1G13800
AFUA_4G08460
AFUA_8G05850
AFUA_3G12520
AFUA_3G00200
AFUA_8G05985
AFUA_4G08580
AFUA_5G13750
AFUA_4G14300
AFUA_2G14525
AFUA_5G09720
AFUA_1G07400
AFUA_1G13940
AFUA_3G07640
AFUA_8G02450
AFUA_3G03320
AFUA_2G17660
AFUA_1G04575
AFUA_2G17820
AFUA_8G00160
AFUA_3G00370
AFUA_5G11170
AFUA_1G11740
AFUA_3G07860
AFUA_4G13780
AFUA_6G13980
AFUA_8G07090
AFUA_8G04890
AFUA_1G01430
AFUA_3G01070
AFUA_7G01000
AFUA_6G00330
AFUA_7G06350
AFUA_2G11180
AFUA_8G06000
AFUA_8G04310
AFUA_8G07100
AFUA_8G06830
AFUA_1G00650
AFUA_5G03310
AFUA_1G06020
AFUA_2G03820
AFUA_3G00500
AFUA_1G10370
AFUA_6G00550
AFUA_2G16430
AFUA_1G13250
AFUA_2G15920
AFUA_8G04620
AFUA_3G00970
AFUA_6G13380
AFUA_2G14520
AFUA_1G17430
AFUA_8G06090
AFUA_4G14240
AFUA_7G01010
AFUA_3G09240
AFUA_6G14442
AFUA_1G14560
AFUA_7G05500
AFUA_8G00620
AFUA_1G13410
AFUA_3G03990
AFUA_1G05020
AFUA_7G01700
AFUA_5G11190
AFUA_4G06580
AFUA_5G09400
AFUA_5G01600
AFUA_3G02190
AFUA_5G01210
AFUA_8G06100
AFUA_8G01340
AFUA_8G00220
AFUA_4G04318
AFUA_8G07080
AFUA_1G14480
AFUA_2G14140
AFUA_1G17170
AFUA_5G06240
AFUA_5G02480
AFUA_4G13630
AFUA_8G00150
AFUA_8G00300
AFUA_2G11520
AFUA_5G09330
AFUA_8G01690
AFUA_4G14230
AFUA_1G13750
AFUA_1G13830
AFUA_3G15050
AFUA_6G03050
AFUA_3G13610
AFUA_2G05150
AFUA_6G03300
AFUA_8G00170
AFUA_4G00410
AFUA_1G13400
AFUA_3G02200
AFUA_6G09730
AFUA_8G00830
AFUA_6G14000
AFUA_8G00290
AFUA_2G14860
AFUA_2G03860
AFUA_7G06200
AFUA_5G10320
AFUA_6G03290
AFUA_2G01760
AFUA_3G08110
AFUA_5G10670
AFUA_4G14350
AFUA_8G02200
AFUA_6G09745
AFUA_7G00910
AFUA_4G08310
AFUA_7G06420
AFUA_8G01850
AFUA_4G09560
AFUA_8G00240
AFUA_4G09580
AFUA_6G00560
AFUA_8G00280
AFUA_4G03240
AFUA_6G09740
AFUA_5G14410
AFUA_4G12710
AFUA_3G10850
AFUA_6G00280
AFUA_6G11810
AFUA_8G06430
AFUA_8G00250
AFUA_7G05490
AFUA_8G00930
AFUA_3G00650
AFUA_6G09720
AFUA_3G00590
AFUA_8G00230
AFUA_4G09320
AFUA_8G06050
AFUA_5G15060
AFUA_6G09670
AFUA_3G13140
AFUA_3G00600
AFUA_6G09620
AFUA_8G01050
AFUA_6G09630
AFUA_2G11120
AFUA_6G12780
AFUA_6G09660
AFUA_6G09610
AFUA_6G09650
AFUA_6G09710
AFUA_6G09640
AFUA_6G09680
AFUA_6G09690
AFUA_6G09700
The comparison is done to p3_r14003_Asp_fumig containing 9630 annotated genes.
291 out of 291 genes are found:
AFUA_1G00650 AFUA_1G00970 AFUA_1G01430 AFUA_1G03360 AFUA_1G03992 AFUA_1G04575 AFUA_1G05020 AFUA_1G05790 AFUA_1G05840 AFUA_1G05850 AFUA_1G06020 AFUA_1G06670 AFUA_1G07220 AFUA_1G07400 AFUA_1G10370 AFUA_1G10780 AFUA_1G11500 AFUA_1G11740 AFUA_1G13250 AFUA_1G13400 AFUA_1G13410 AFUA_1G13610 AFUA_1G13750 AFUA_1G13800 AFUA_1G13830 AFUA_1G13940 AFUA_1G14480 AFUA_1G14500 AFUA_1G14560 AFUA_1G17170 AFUA_1G17…
		FUNCTIONAL CATEGORY	abs SET	rel SET	genes SET	abs GENOME	rel GENOME	rel SET/rel GENOME	P-VALUE
		01 METABOLISM	124	42.6	AFUA_8G00230 AFUA_8G00190 AFUA_8G06090 AFUA_8G06830 AFUA_8G00930 AFUA_8G01910 AFUA_8G06980 AFUA_8G00210 AFUA_8G07200 AFUA_8G05580 AFUA_8G00250 AFUA_8G00240 AFUA_8G02200 AFUA_8G01340 AFUA_8G00220 AFUA_8G01050 AFUA_8G00200 AFUA_8G06000 AFUA_8G00280 AFUA_8G00170 AFUA_8G05610 AFUA_8G06050 AFUA_8G00620 AFUA_7G02310 AFUA_7G00440 AFUA_7G06620 AFUA_7G01000 AFUA_7G00910 AFUA_7G08350 AFUA_7G01010 AFUA_7G05…	3379	35	1.21714	0.00416696
		01.01.06.04.02 degradation of threonine	2	0.68	AFUA_4G08140 AFUA_2G03820	10	0.1	6.8	0.0348887
		01.01.09.03.02 degradation of cysteine	2	0.68	AFUA_5G04250 AFUA_5G14410	8	0.08	8.5	0.0225891
		01.01.09.05.02 degradation of tyrosine	3	1.03	AFUA_4G13780 AFUA_3G01070 AFUA_1G17430	18	0.18	5.72222	0.015917
		01.02 nitrogen, sulfur and selenium metabolism	14	4.81	AFUA_8G00190 AFUA_7G00910 AFUA_7G05500 AFUA_7G06420 AFUA_6G09690 AFUA_6G09640 AFUA_5G04250 AFUA_4G06570 AFUA_4G03760 AFUA_4G03410 AFUA_2G03900 AFUA_2G04080 AFUA_1G05020 AFUA_1G17170	255	2.64	1.82197	0.0226615
		01.05.06 C-2 compound and organic acid metabolism	6	2.06	AFUA_8G06000 AFUA_7G01000 AFUA_7G01010 AFUA_5G06240 AFUA_3G11070 AFUA_3G10750	33	0.34	6.05882	0.00040228
		01.05.06.07 C-2 compound and organic acid catabolism	5	1.71	AFUA_7G01000 AFUA_7G01010 AFUA_5G06240 AFUA_3G11070 AFUA_3G10750	26	0.26	6.57692	0.000950024
		01.20 secondary metabolism	60	20.6	AFUA_8G00230 AFUA_8G00190 AFUA_8G06090 AFUA_8G00210 AFUA_8G07200 AFUA_8G00250 AFUA_8G00240 AFUA_8G02200 AFUA_8G00220 AFUA_8G01050 AFUA_8G00200 AFUA_8G06000 AFUA_8G00170 AFUA_8G06050 AFUA_8G00620 AFUA_7G00440 AFUA_7G06620 AFUA_7G05500 AFUA_7G06420 AFUA_6G01820 AFUA_6G09680 AFUA_6G09710 AFUA_6G09720 AFUA_6G09730 AFUA_6G09660 AFUA_6G09690 AFUA_6G09610 AFUA_6G09740 AFUA_6G09640 AFUA_6G09670 AFUA_6G13…	1132	11.7	1.76068	7.67263e-06
		01.20.15.03 metabolism of ubiquinone	2	0.68	AFUA_6G12220 AFUA_2G09355	12	0.12	5.66667	0.0491857
		01.20.33 metabolism of secondary products derived from L-tryptophan	3	1.03	AFUA_8G00210 AFUA_8G00250 AFUA_8G00620	16	0.16	6.4375	0.01142
		01.20.35.01.01 metabolism of melanins	3	1.03	AFUA_4G13780 AFUA_3G01070 AFUA_1G17430	17	0.17	6.05882	0.013562
		01.20.36 non-ribosomal peptide synthesis	4	1.37	AFUA_8G00170 AFUA_6G09660 AFUA_6G09610 AFUA_1G01430	32	0.33	4.15152	0.015085
		01.20.37 metabolism of peptide derived compounds	6	2.06	AFUA_7G05500 AFUA_6G09660 AFUA_6G09690 AFUA_6G09740 AFUA_3G15010 AFUA_3G13140	38	0.39	5.28205	0.000883393
		01.20.37.01 metabolism of thioredoxin, glutaredoxin, glutathion	3	1.03	AFUA_7G05500 AFUA_6G09690 AFUA_6G09740	17	0.17	6.05882	0.013562
		01.20.37.05 metabolism of beta-lactams	2	0.68	AFUA_3G15010 AFUA_3G13140	12	0.12	5.66667	0.0491857
		02.16 fermentation	9	3.09	AFUA_7G01000 AFUA_7G01010 AFUA_5G06240 AFUA_3G10760 AFUA_3G11070 AFUA_3G00370 AFUA_3G10750 AFUA_2G03820 AFUA_2G15930	89	0.92	3.3587	0.00141942
		02.16.01 alcohol fermentation	4	1.37	AFUA_7G01000 AFUA_7G01010 AFUA_5G06240 AFUA_3G11070	37	0.38	3.60526	0.024647
		02.16.03.03 heterofermentative pathway and fermentaton of other saccharides	2	0.68	AFUA_3G10760 AFUA_3G00370	2	0.02	34	0.000910088
		02.16.09 mixed acid and butanediol fermentation	1	0.34	AFUA_2G15930	1	0.01	34	0.0302181
		14.13.04 lysosomal and vacuolar protein degradation	4	1.37	AFUA_4G03490 AFUA_4G11800 AFUA_4G09320 AFUA_3G00650	39	0.4	3.425	0.0292973
		14.13.04.02 vacuolar protein degradation	3	1.03	AFUA_4G11800 AFUA_4G09320 AFUA_3G00650	19	0.19	5.42105	0.0184869
		16.21.01 heme binding	5	1.71	AFUA_8G00220 AFUA_6G09730 AFUA_6G09670 AFUA_3G02270 AFUA_3G14250	64	0.66	2.59091	0.0436569
		20 CELLULAR TRANSPORT, TRANSPORT FACILITIES AND TRANSPORT ROUTES	62	21.3	AFUA_8G00190 AFUA_8G02550 AFUA_8G06090 AFUA_8G01910 AFUA_8G07200 AFUA_8G02200 AFUA_8G01340 AFUA_8G01480 AFUA_8G00220 AFUA_8G01050 AFUA_8G06000 AFUA_8G01850 AFUA_7G00440 AFUA_7G06620 AFUA_7G01000 AFUA_7G00910 AFUA_7G01490 AFUA_7G06420 AFUA_7G06130 AFUA_7G06350 AFUA_6G01820 AFUA_6G09710 AFUA_6G09740 AFUA_6G09670 AFUA_6G11810 AFUA_6G14442 AFUA_6G00640 AFUA_6G00630 AFUA_6G13980 AFUA_5G09720 AFUA_5G11…	1671	17.3	1.23121	0.044429
		20.01 transported compounds (substrates)	58	19.9	AFUA_8G00190 AFUA_8G02550 AFUA_8G06090 AFUA_8G01910 AFUA_8G07200 AFUA_8G02200 AFUA_8G01340 AFUA_8G01480 AFUA_8G00220 AFUA_8G01050 AFUA_8G06000 AFUA_8G01850 AFUA_7G00440 AFUA_7G06620 AFUA_7G01000 AFUA_7G00910 AFUA_7G01490 AFUA_7G06420 AFUA_7G06130 AFUA_7G06350 AFUA_6G01820 AFUA_6G09710 AFUA_6G09740 AFUA_6G09670 AFUA_6G11810 AFUA_6G14442 AFUA_6G00640 AFUA_6G00630 AFUA_5G09720 AFUA_5G11850 AFUA_5G14…	1299	13.4	1.48507	0.00122381
		20.01.03 C-compound and carbohydrate transport	17	5.84	AFUA_8G06090 AFUA_8G01340 AFUA_7G00440 AFUA_7G06620 AFUA_7G06130 AFUA_6G14442 AFUA_6G00640 AFUA_5G11850 AFUA_5G02840 AFUA_3G00200 AFUA_3G00430 AFUA_3G03320 AFUA_2G17660 AFUA_2G04550 AFUA_2G04080 AFUA_2G11520 AFUA_1G00970	240	2.49	2.34538	0.000965525
		20.01.07 amino acid/amino acid derivatives transport	7	2.4	AFUA_8G06090 AFUA_8G07200 AFUA_8G02200 AFUA_7G00440 AFUA_5G11850 AFUA_5G04260 AFUA_2G00180	99	1.02	2.35294	0.030057
		20.01.09 peptide transport	3	1.03	AFUA_8G02550 AFUA_7G00910 AFUA_7G01490	20	0.2	5.15	0.0212731
		20.03 transport facilities	36	12.3	AFUA_8G02550 AFUA_8G06090 AFUA_8G01340 AFUA_8G01480 AFUA_8G01850 AFUA_7G00440 AFUA_7G06620 AFUA_7G00910 AFUA_7G01490 AFUA_7G06130 AFUA_7G06350 AFUA_6G01820 AFUA_6G09710 AFUA_6G11810 AFUA_6G14442 AFUA_6G00640 AFUA_6G00630 AFUA_6G13980 AFUA_5G11850 AFUA_5G02840 AFUA_5G09750 AFUA_5G05640 AFUA_4G09440 AFUA_4G09560 AFUA_3G00200 AFUA_3G03320 AFUA_3G07640 AFUA_3G01840 AFUA_2G09355 AFUA_2G04550 AFUA_2G04…	639	6.63	1.8552	0.000204028
		20.03.02.02.02 sodium driven symporter	2	0.68	AFUA_8G01850 AFUA_7G06350	8	0.08	8.5	0.0225891
		20.09.18 cellular import	25	8.59	AFUA_8G02550 AFUA_8G06090 AFUA_8G02200 AFUA_8G01340 AFUA_8G01850 AFUA_7G00440 AFUA_7G01490 AFUA_7G06350 AFUA_6G01820 AFUA_6G14442 AFUA_6G00630 AFUA_5G02840 AFUA_5G09750 AFUA_5G04260 AFUA_4G09560 AFUA_3G00200 AFUA_3G00430 AFUA_3G03320 AFUA_3G01840 AFUA_2G17660 AFUA_2G04550 AFUA_2G03860 AFUA_2G11520 AFUA_1G05020 AFUA_1G00970	430	4.46	1.92601	0.00127968
		20.09.18.07 non-vesicular cellular import	18	6.18	AFUA_8G02550 AFUA_8G02200 AFUA_8G01340 AFUA_7G01490 AFUA_6G01820 AFUA_6G14442 AFUA_6G00630 AFUA_5G04260 AFUA_4G09560 AFUA_3G00200 AFUA_3G00430 AFUA_3G03320 AFUA_3G01840 AFUA_2G17660 AFUA_2G04550 AFUA_2G03860 AFUA_1G05020 AFUA_1G00970	190	1.97	3.13706	1.69878e-05
		32.05 disease, virulence and defense	20	6.87	AFUA_8G06980 AFUA_8G00240 AFUA_8G00200 AFUA_8G00170 AFUA_7G06620 AFUA_7G01000 AFUA_7G06130 AFUA_6G09710 AFUA_6G13490 AFUA_6G09730 AFUA_6G09660 AFUA_6G09610 AFUA_6G00640 AFUA_5G02860 AFUA_4G14300 AFUA_4G03410 AFUA_3G14250 AFUA_3G00590 AFUA_1G10370 AFUA_1G13800	340	3.53	1.94618	0.00337713
		32.05.03 defense related proteins	7	2.4	AFUA_8G06980 AFUA_8G00240 AFUA_7G01000 AFUA_6G13490 AFUA_6G09730 AFUA_6G09660 AFUA_4G14300	55	0.57	4.21053	0.00125284
		32.05.05 virulence, disease factors	8	2.74	AFUA_8G00200 AFUA_8G00170 AFUA_7G06620 AFUA_7G06130 AFUA_6G09610 AFUA_6G00640 AFUA_5G02860 AFUA_3G00590	123	1.27	2.15748	0.0327134
		32.05.05.01 toxins	3	1.03	AFUA_8G00200 AFUA_8G00170 AFUA_6G09610	27	0.28	3.67857	0.0467947
		32.07 detoxification	18	6.18	AFUA_8G00220 AFUA_8G06050 AFUA_7G01000 AFUA_7G05500 AFUA_6G09710 AFUA_6G09730 AFUA_6G09690 AFUA_6G09670 AFUA_6G11810 AFUA_4G08580 AFUA_4G14230 AFUA_3G02270 AFUA_3G15050 AFUA_2G17840 AFUA_2G14860 AFUA_1G10370 AFUA_1G13800 AFUA_1G17170	375	3.89	1.58869	0.0353456
		32.07.07 oxygen and radical detoxification	5	1.71	AFUA_7G05500 AFUA_6G09690 AFUA_4G08580 AFUA_3G02270 AFUA_2G14860	64	0.66	2.59091	0.0436569
		36 SYSTEMIC INTERACTION WITH THE ENVIRONMENT	3	1.03	AFUA_6G09640 AFUA_5G15060 AFUA_4G00660	20	0.2	5.15	0.0212731
		36.20 plant / fungal specific systemic sensing and response	3	1.03	AFUA_6G09640 AFUA_5G15060 AFUA_4G00660	20	0.2	5.15	0.0212731
		36.20.18 plant hormonal regulation	3	1.03	AFUA_6G09640 AFUA_5G15060 AFUA_4G00660	20	0.2	5.15	0.0212731
To correct for multiple comparisons in multiple hypothesis testing for the 845 taxonomical allowed FunCats, we calculated the Bonferroni correction as well as the False discovery rate (FDR) control with an experiment-wide significance level alpha of 0.05. The table is sorted by the p-value (k position). You will find as filter the holding criteria B=Bonferroni correction < 0.05, F:p-value < False…
